# Supplementary material for: Whole body muscle activity during weightlifting exercise evaluated by positron emission tomography
Source: Research Square preprint supplement (doi:10.21203/rs.3.rs-612816/v1), 2021-06-14
Supplement: Supplementary file 1 [file e4647b4785ad1a6c184708fe.xlsx]

## Sheet: Table. 2
			ROI volumes						ROI volumes
	Body area	muscles	exercise group	control group	P value		Body area	muscles	exercise group	control group	P value
	Neck	Upper trapezius	1.34±0.80	0.69±0.07	0.06		Upper arm	Biceps brachii	1.27±0.88	0.59±0.12	0.007
		Middle trapezius	2.18±1.17	0.77±0.08	0.001			Brachialis	1.61±0.75	0.63±0.14	0.002
		Lower trapezius	1.35±0.78	0.57±0.09	0.001			Triceps brachii	0.62±0.16	0.54±0.12	0.2
		Levator scapulae	0.80±0.19	0.58±0.13	0.007			Anconeus	0.93±0.31	0.74±0.18	0.11
	Back	Rhomboideus	1.07±0.34	0.76±0.09	0.003		Lower arm	Pronator teres	1.44±0.86	0.76±0.18	0.006
		Latissimus dorsi	1.06±0.54	0.57±0.09	0.07			Flexor digitorum superficialis	3.32±2.51	0.73±0.10	0.001
	Shoulder	Subscapularis	0.89±0.21	0.77±0.09	0.28			Flexor digitorum profundus	3.35±1.89	0.73±0.10	0.001
		Supraspinatus	0.86±0.23	0.79±0.09	0.72			Pronator quadratus	0.97±0.41	0.72±0.20	0.35
		Infraspinatus	1.01±0.52	0.80±0.12	0.92			Brachioradialis	1.27±0.34	0.88±0.17	0.001
		Teres minor	0.93±0.43	0.85±0.14	0.87			Extensor digitorum communis	1.27±0.34	0.88±0.17	0.002
		Teres major	1.36±0.65	0.65±0.16	0.014			Abductor pollicis bervis	1.12±0.71	0.77±0.14	0.28
		Anterior deltoid	0.60±0.07	0.60±0.10	0.97			Adductor hallucis	1.70±1.24	1.03±0.24	0.09
		Middle deltoid	0.91±0.26	0.64±0.09	0.003			Abductor digiti minimi	1.08±0.50	0.86±0.20	0.42
		Posterior deltoid	2.20±0.86	0.63±0.10	0.001			Lumbricalis pedis	2.67±1.87	0.97±0.21	0.001
		Coracobrachialis	1.02±0.20	0.88±0.14	0.09
	Chest	Greater pectoralis	0.56±0.10	0.58±0.11	0.82
		Pectoralis minor	0.71±0.23	0.68±0.10	0.92
		Serratus anterior	0.76±0.12	0.68±0.10	0.35
